# Supplementary material for: Interaction of Fibromodulin and Myostatin to Regulate Skeletal Muscle Aging: An Opposite Regulation in Muscle Aging, Diabetes, and Intracellular Lipid Accumulation
Source: MDPI journal article supplement (doi:10.3390/cells10082083), 2021-08-13

**Supplementary Table S1. Primer information**

| Species | Gene          | Product size (bp) | Tm (°C) | Sequence (F)                | Sequence (R)               |
|---------|---------------|-------------------|---------|-----------------------------|----------------------------|
| Mouse   | GAPDH         | 155               | 59      | 5'-tgctgggtgctgagtatgtcg-3' | 5'-caagcagttgggtgtacagg-3' |
| Mouse   | MSTN          | 163               | 59      | 5'-acgtaccacgggaacaac-3'    | 5'-ggagtctgacgggtctgag-3'  |
| Mouse   | MYOG          | 185               | 59      | 5'-tccagtacattgagcgccta-3'  | 5'-caaatgatctcctgggttg-3'  |
| Mouse   | MYL2          | 177               | 59      | 5'-aaagaggctccagtcgaat-3'   | 5'-cctctctgctgtgtgtca-3'   |
| Mouse   | Atrogin1      | 160               | 59      | 5'-ttcagcagcctgaactacga-3'  | 5'-tgaaagcttccccaaagta-3'  |
| Mouse   | CD163         | 218               | 59      | 5'-ctggctggtggaagtga-3'     | 5'-cgccactgagcatagtga-3'   |
| Mouse   | RAGE          | 160               | 59      | 5'-aggagctgcagagctgaat-3'   | 5'-ctggttgagaaggaagtc-3'   |
| Mouse   | Gli1          | 228               | 59      | 5'-cctattggaatgggtccaac-3'  | 5'-taccagagcttcagccact-3'  |
| Mouse   | PPAR $\gamma$ | 232               | 59      | 5'-aagagctgaccaatggtg-3'    | 5'-accctgcatcctcacaag-3'   |
| Mouse   | CD36          | 187               | 59      | 5'-tggagctgttattggtgcag-3'  | 5'-tgggtttgcacataaaga-3'   |
| Mouse   | P53           | 242               | 59      | 5'-cgggtggaaggaaatttga-3'   | 5'-gcacaaacacgaacctcaa-3'  |
| Mouse   | Bax           | 173               | 59      | 5'-tgcagaggatgattgctgac-3'  | 5'-gatcagctcgggcacttag-3'  |
| Mouse   | FOXO3         | 215               | 59      | 5'-ttaaggataaggcgacag-3'    | 5'-cctcggctcttggtgtactt-3' |

**Supplementary Figure S1.**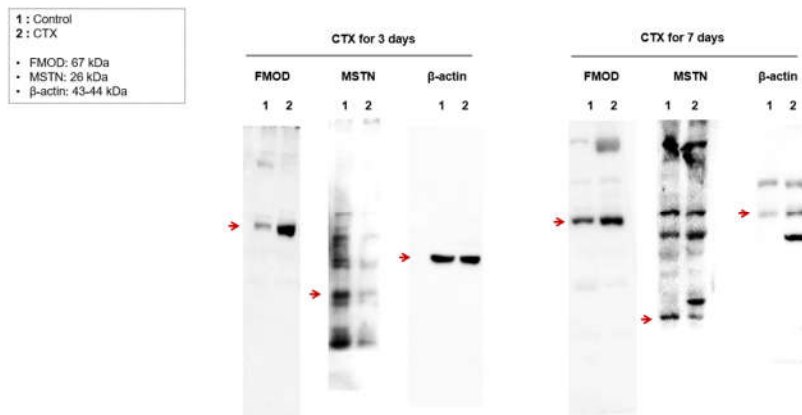

Figure 2

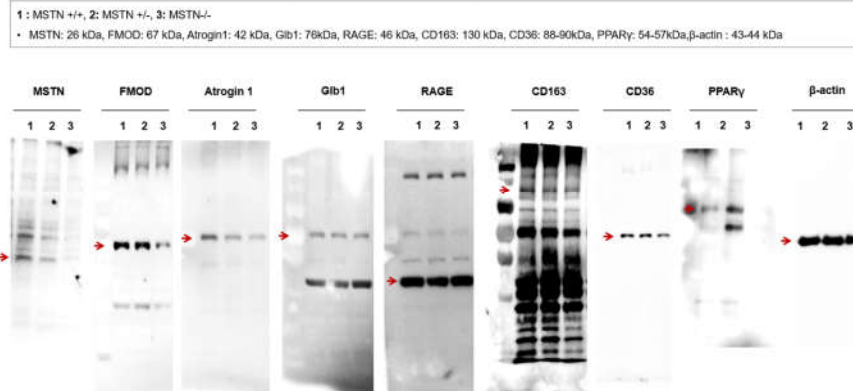

Figure 3

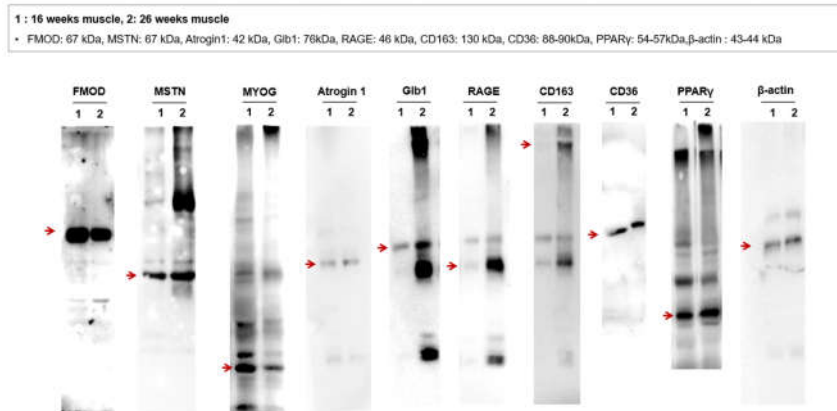

Figure 3

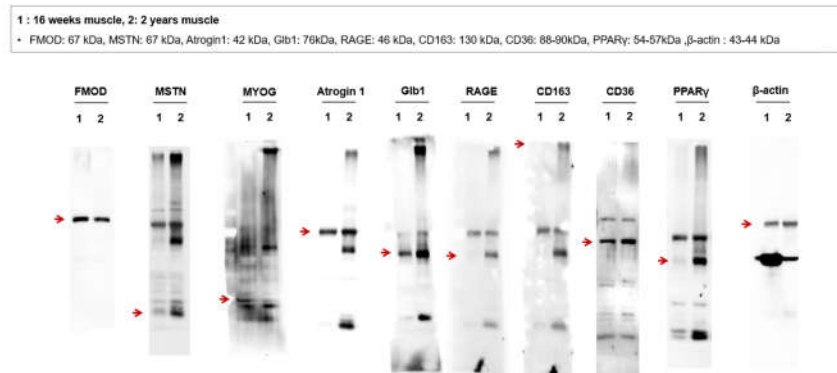

Figure 4

1 : Control, 2: Ceramide  
• FMOD: 67 kDa, MSTN: 67 kDa, Atrogin1: 42 kDa, Glib1: 76kDa, RAGE: 46 kDa, CD163: 130 kDa, CD36: 88-90kDa, PPAR $\gamma$ : 54-57kDa,  $\beta$ -actin : 43-44 kDa

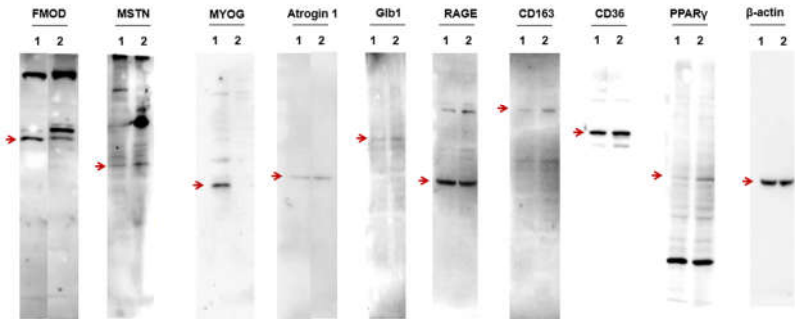

Figure 5

1 : Day 0, 2: Day 4  
• FMOD: 67 kDa, MSTN: 67 kDa, CD36: 88-90kDa, PPAR $\gamma$ :54-57kDa,  $\beta$ -actin:43-44 kDa

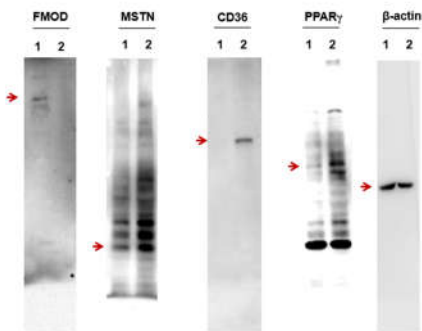

Figure 5

1 : FMODwt, 2. FMODkd  
• FMOD: 67 kDa, MSTN: 67 kDa, CD36: 88-90kDa, PPAR $\gamma$ :54-57kDa,  $\beta$ -actin:43-44 kDa

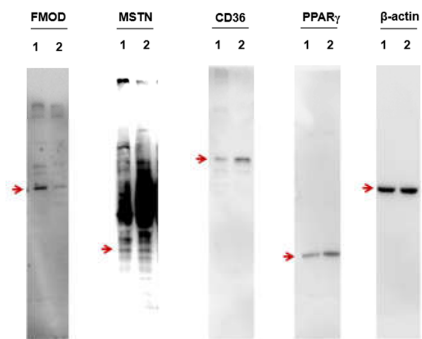

Figure 5

1 : MSTNwt, 2. MSTNkd  
• FMOD: 67 kDa, MSTN: 67 kDa, CD36: 88-90kDa, PPAR $\gamma$ :54-57kDa, $\beta$ -actin:43-44 kDa

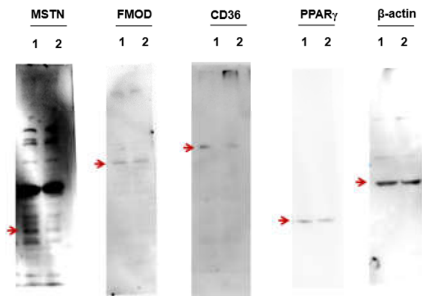

Figure 6

1 : Normal, 2. HFD  
• FMOD: 67 kDa, MSTN: 67 kDa, CD36: 88-90kDa, PPAR $\gamma$ :54-57kDa, $\beta$ -actin:43-44 kDa, CD163: 130 kDa, Atrogin1: 42 kDa

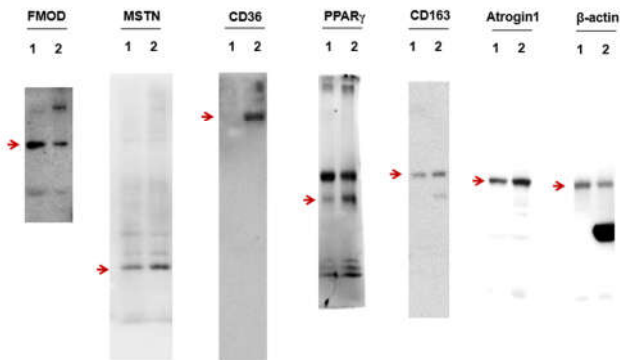

Supplementary Figure 1

1 : MSTNwt, 2. MSTNkd  
• FMOD: 67 kDa, MSTN: 67 kDa, CD36: 88-90kDa, PPAR $\gamma$ :54-57kDa, $\beta$ -actin:43-44 kDa, CD163: 130 kDa, Atrogin1: 42 kDa

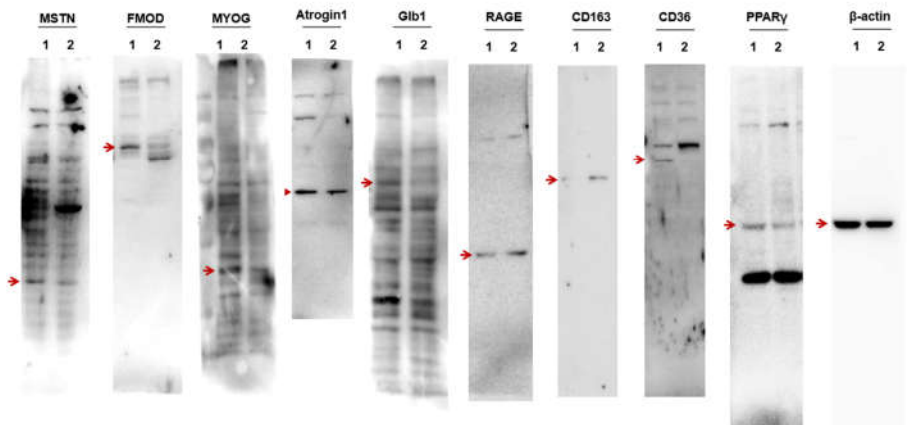

Supplementary Figure 1

FMODwt\_2%FBS

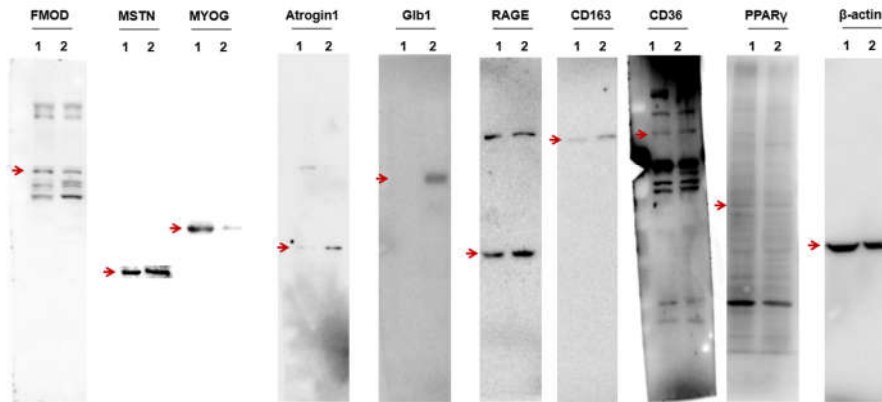

Supplementary Figure S2.

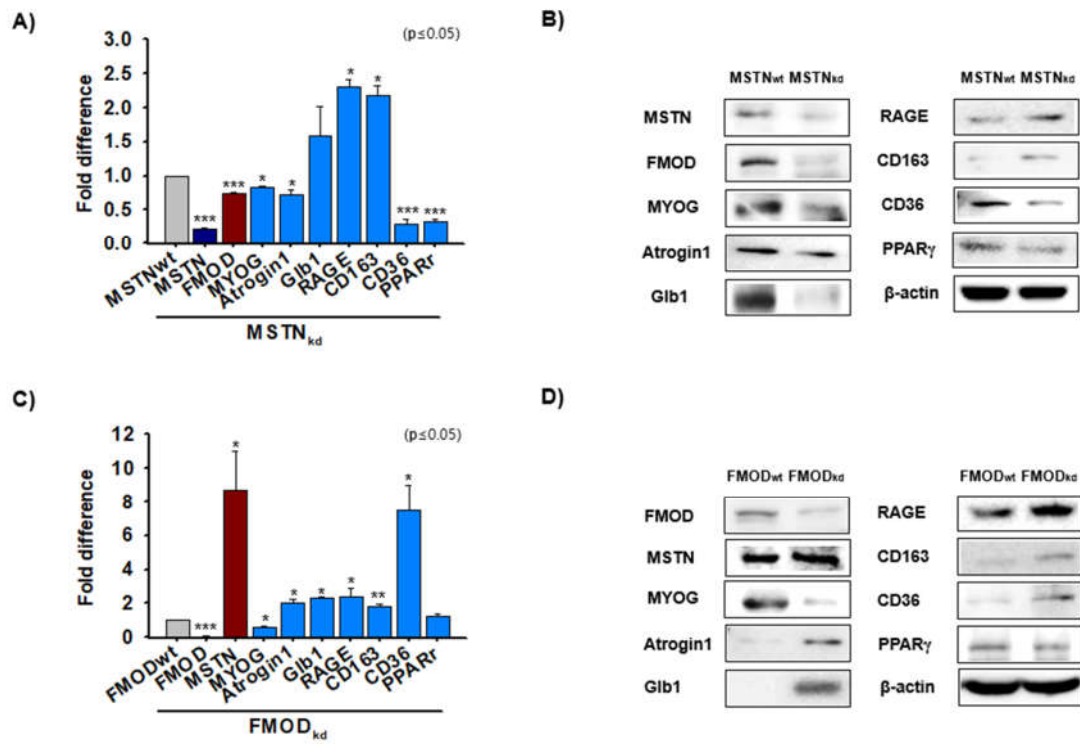

Supplementary Figure S3.

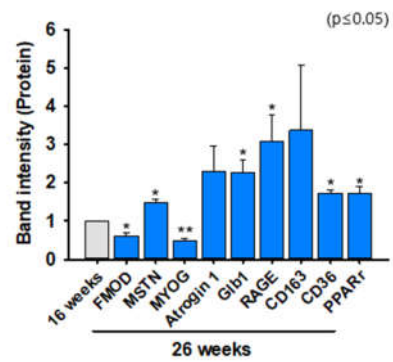

Supplementary Figure S4.

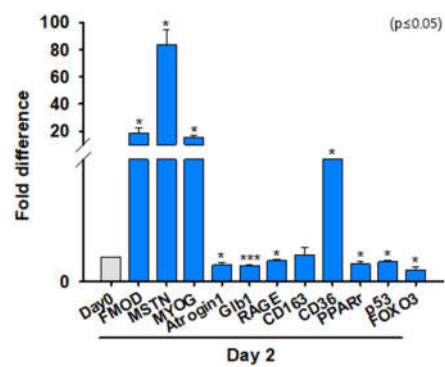

Supplementary Figure S5.

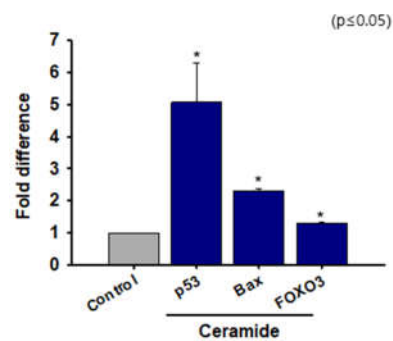

Supplement: s1 [file s1]
